# Supplementary material for: HIV incidence and predictors of inconsistent condom use among adult men enrolled into an HIV vaccine preparedness study, Rustenburg, South Africa
Source: PubMed Central journal article supplement (PMC6447216; doi:10.1371/journal.pone.0214786), 2019-04-03
Supplement: pone.0214786.s006.pdf [file pone.0214786.s006.pdf]

Date: \_\_\_\_ / \_\_\_\_ / \_\_\_\_  
 DD / MON / Y Y Y Y

Put 5 digit PIN here → \_\_\_\_\_

Start time: \_\_\_\_ : \_\_\_\_  
 hh mm

**AURUM CLINICAL ASQ**

| Mo dikgweding di le 3 tse di fetileng... |                                                                                                                                      |                   | CODE |
|------------------------------------------|--------------------------------------------------------------------------------------------------------------------------------------|-------------------|------|
| STI1                                     | ...a go na le ngaka nngwe kgotsa mooki mongwe yo o kileng a go tlhatlhobela bolwetse bope fela jo bo tshelanwang ka thobalano (STI)? | 0= Nnyaa<br>1= Ee |      |
| STI2                                     | ...a o kile wa okelwa bolwetse jo bo tshelanwang ka thobalano (STI)?                                                                 | 0= Nnyaa<br>1= Ee |      |
| STI3<br>RIS14                            | ...a o setse o kile wa tswa seeledi sepe fela se se nkgang kgotsa se se sa tlwaelegang go tswa mo bosading kgotsa mo bonneng?        | 0= Nnyaa<br>1= Ee |      |
| STI4                                     | ...a o kile wa utlwa botlhoko fa o ntsha motlhapo?                                                                                   | 0= Nnyaa<br>1= Ee |      |
| STI5                                     | ...a o kile wa nna le peine ka nako ya thobalano?                                                                                    | 0= Nnyaa<br>1= Ee |      |
| STI6<br>RIS15                            | ...a o setse o kile wa nna le ntho mo bosading kgotsa mo bonneng?                                                                    | 0= Nnyaa<br>1= Ee |      |
| STI7                                     | <b>IF FEMALE...</b> a o kile wa nna le peine mo karolong e e kwa tlase mo mpeng?<br>Code=97 if male                                  | 0= Nnyaa<br>1= Ee |      |
| STI8                                     | <b>IF FEMALE:</b> ...a o kile wa tlhotlhonelwa kgotsa wa ikutlwa ekete o a fisa mo bosading?<br>Code=97 if male                      | 0= Nnyaa<br>1= Ee |      |

**ASK OF MEN ONLY (if female code = 97)**

| Jaanong go latela dipotso tse di leng kaga go rupisiwa mo bonneng jwa gago—eleng thulaganyo e go tloswang letlalo la molomo wa bonna jwa gago mo go yone. |                                                                                                                            |                      | CODE |
|-----------------------------------------------------------------------------------------------------------------------------------------------------------|----------------------------------------------------------------------------------------------------------------------------|----------------------|------|
| CIR1                                                                                                                                                      | A o setse o kile wa rupisiwa mo bonneng ke ngaka kgotsa ke mooki?                                                          | 0= Nnyaa<br>1= Ee    |      |
| CIR2                                                                                                                                                      | <b>[If yes, circumcised by doctor/nurse]</b><br>O ne o na le dingwaga tse kae fa o ne o rupisiwa ke ngaka kgotsa mooki?    | Code age<br>in years |      |
| CIR3                                                                                                                                                      | <b>[If no, not medically circumcised]</b><br>A o ka rata go direlwa lekwalo la gore o ye go bona ngaka e e ka go rupisang? | 0= Nnyaa<br>1= Ee    |      |
| CIR4                                                                                                                                                      | A o setse o kile wa rupisiwa mo bonneng kwa bogwera?                                                                       | 0=Nnyaa<br>1=Ee      |      |
| CIR5                                                                                                                                                      | <b>[If circumcised in cultural practice]</b><br>O ne o na le dingwaga tse kae fa o rupisiwa kwa bogwera?                   | Code age<br>in years |      |

Date: \_\_\_\_ / \_\_\_\_ / \_\_\_\_  
 DD / MON / Y Y Y Y

Put 5 digit PIN here → \_\_\_\_\_

Jaanong ke tlile go go botsa ka dilo tse wena kgotsa motho yo o ratanang le ene lo ka tswang lo di dirisitse mo dikgweding tse 3 tse di fetileng. Fa e le gore o ne o na le motho a le mongwe yo o ratanang le ene mo dikgweding tse 3 tse di fetileng, ke kopa gore o akanye ka motho yoo fa o araba dipotso tseno. Fa e le gore o ne o na le batho ba ba fetang a le mongwe ba o ratanang le bone mo dikgweding tse tharo tse di fetileng, ke kopa gore o akanye ka motho yo o ratanang le ene yo o robalaneng le ene gantsi go feta botlhe.

|                                                                                                                                                                                                               |                                                                                                                  |                                                                                                                                                                                                                       |
|---------------------------------------------------------------------------------------------------------------------------------------------------------------------------------------------------------------|------------------------------------------------------------------------------------------------------------------|-----------------------------------------------------------------------------------------------------------------------------------------------------------------------------------------------------------------------|
| <b>Jaanong ke tlile go go balela lenaane. Ke kopa gore o mpolelele gore a wena kgotsa motho yo o ratanang le ene o dirisitse mokgwa ope fela mo go e e latelang mo dikgweding tse 3 tse di fetileng...</b>    |                                                                                                                  | <b>CODES</b><br>0=Nnyaa<br>1=Ee<br>88=Ga Ke Itse<br>97= ga e maleba, ga ke a robalana le ope                                                                                                                          |
| C1                                                                                                                                                                                                            | go tlhabiwa ka dihoromone (depo)                                                                                 |                                                                                                                                                                                                                       |
| C2                                                                                                                                                                                                            | dipilise tsa dihoromone tsa go thibela pelegi (pilise)                                                           |                                                                                                                                                                                                                       |
| C3                                                                                                                                                                                                            | wa senya mpa (ka boomo)                                                                                          |                                                                                                                                                                                                                       |
| <b>Jaanong ke kopa gore o mpolelele gore a wena kgotsa motho yo o ratanang le ene o dirisitse mokgwa ope fela mo go e e latelang <u>gantsi go le kana kang</u> mo dikgweding tse tharo tse di fetileng...</b> |                                                                                                                  | <b>CODES</b><br>0=Ga ke ise ke dirise ope<br>1=Ka dinako tse dingwe<br>2= halofo ya nako<br>3= Gantsi thata<br>4=Mo e ka nnag ka nako yotlhe<br>5= Ruri ka dinako tsotlhe<br>97= ga e maleba, ga ke a robalana le ope |
| C4                                                                                                                                                                                                            | dikhondomo tsa banna                                                                                             |                                                                                                                                                                                                                       |
| C5                                                                                                                                                                                                            | dikhondomo tsa basadi                                                                                            |                                                                                                                                                                                                                       |
| C6                                                                                                                                                                                                            | O ile wa somola bonna jwa gago pele ga peo ya bonna e tswa, kgotsa wa tshololela peo ya bonna kwa ntle ga basadi |                                                                                                                                                                                                                       |

|                                                       |                                                                                                         |                                 |
|-------------------------------------------------------|---------------------------------------------------------------------------------------------------------|---------------------------------|
| <b>A wena kgotsa molekane wa gago o kile a/wa ...</b> |                                                                                                         | <b>CODES</b><br>0=Nnyaa<br>1=Ee |
| C7                                                    | go bofiwa ditšhupu tsa popelo (go opofadiwa ga basadi kgotsa go bofiwa ga ditšhupu tsa bone tsa popelo) |                                 |
| C8                                                    | hysterectomy (karo ya go tlosa popelo ya mosadi)                                                        |                                 |
| C9                                                    | vasectomy (go opofadiwa ga banna)                                                                       |                                 |

|                                                                                                                                               |                                                                                                                                                       |                           |             |
|-----------------------------------------------------------------------------------------------------------------------------------------------|-------------------------------------------------------------------------------------------------------------------------------------------------------|---------------------------|-------------|
| <b>Jaanong ke tlile go go botsa gore o robalane gantsi go le kana kang mo bekeng e e fetileng, ke gore, mo malatsing a le 7 a a fetileng.</b> |                                                                                                                                                       |                           | <b>CODE</b> |
| LW1                                                                                                                                           | O robalane mo bosading gantsi go le kana kang mo malatsing a le 7 a a fetileng, go akaretsa le gompieno?                                              | Code number of sex acts → |             |
| LW2                                                                                                                                           | A palo eno e o robalaneng ka yone mo bosading mo bekeng e le nngwe ke selekanyo sa ka tlwaelo mo go wena (palo ya ka gale mo go wena ya go robalana)? | 0= Nnyaa<br>1= Ee         |             |
| LW3                                                                                                                                           | O robalane makgetlo a le kae mo sebonong mo bekeng e e fetileng?                                                                                      | Code                      |             |

Date: \_\_\_\_ / \_\_\_\_ / \_\_\_\_  
 DD / MON / Y Y Y Y

Put 5 digit PIN here → \_\_\_\_\_

|     |                                                                                                                                                       |                      |  |
|-----|-------------------------------------------------------------------------------------------------------------------------------------------------------|----------------------|--|
|     |                                                                                                                                                       | number of sex acts → |  |
| LW4 | A palo eno e o robalaneng ka yone mo sebonong mo bekeng e le nngwe ke selekanyo sa ka tlwaelo mo go wena (palo ya ka gale mo go wena ya go robalana)? | 0= Nnyaa<br>1= Ee    |  |

Date: \_\_\_\_ / \_\_\_\_ / \_\_\_\_  
 DD / MON / Y Y Y Y

Put 5 digit PIN here → \_\_\_\_\_

| ASK THESE OF PEOPLE WHO SAID THEY HAVE PULLED OUT THE PENIS IN LAST 3 MOS |                                                                                                                                                                                       |                                                                                                                                                                                                                                                                       | CODE                            |
|---------------------------------------------------------------------------|---------------------------------------------------------------------------------------------------------------------------------------------------------------------------------------|-----------------------------------------------------------------------------------------------------------------------------------------------------------------------------------------------------------------------------------------------------------------------|---------------------------------|
| CIY1                                                                      | Ke mang yo o tlleng ka tlhaloganyo ya gore o somole bonna jwa gago?                                                                                                                   | 0= E ne e le tlhaloganyo ya me<br>1= E ne e le tlhaloganyo ya motho yo ke ratanang le ene<br>2= Ka bobedi<br>3= E ne e se tlhaloganyo ya ope wa rona - go itiragaletse fela<br>4= Tse dingwe                                                                          |                                 |
| CIY2                                                                      | If code other above<br>Write reason for pulling out here →                                                                                                                            |                                                                                                                                                                                                                                                                       |                                 |
| CIY3                                                                      | A wena le motho yo o ratanang le ene lo ile lwa buisana pele ga lo robalana kgotsa ka nako e lo neng lo robalane ka yone malebang le gore o somole bonna jwa gago?                    | 0= Nnyaa<br>1= Ee                                                                                                                                                                                                                                                     |                                 |
| CIY4                                                                      | IF YES – Mpolelela gore kgang eno e tllile <u>jang</u> , le gore <u>ke eng</u> se lo neng lo tlotla ka sone →                                                                         |                                                                                                                                                                                                                                                                       |                                 |
| CIY5                                                                      | Ke ka ntlha yang wena kgotsa motho yo o ratanang le ene a ile a somola bonna jwa gagwe?<br><br>[DO NOT READ ANSWERS OUT ALOUD – LET PARTICIPANT ANSWER FIRST. USE OTHER IF NECESSARY] | 0= Go thibela HIV<br>1= Go thibela malwetse a a tshelanwang ka thobalano (STI)<br>2= Go thibela go ithwala<br>3= Go thibela go ithwala le bolwetse<br>4= Ga ke itse - go itiragaletse fela<br>5= Ka ntlha ya mabaka a setso - tlhalosa fa tlase fano<br>6= Tse dingwe |                                 |
| CIY6                                                                      | If coded as 'cultural' or other above write reason for pulling out here →                                                                                                             |                                                                                                                                                                                                                                                                       |                                 |
| CIY7                                                                      | O na le nako e e kae o ratana le motho yono (yo o somotseng bonna fa o na le ene?)                                                                                                    | Code in months for all total time together (take out times not together).<br>Code 0 if one time partner →                                                                                                                                                             |                                 |
|                                                                           | Lekgetlo la bofelo le o somotseng bonna ka lone, ke kopa gore o mpolelele gore ke eng se sengwe se o neng o se dirisa ka yone nako eo...                                              |                                                                                                                                                                                                                                                                       | <b>CODES</b><br>0=Nnyaa<br>1=Ee |
| CIY8                                                                      | ...go tlhabiwa ka dihoromone (depo)                                                                                                                                                   |                                                                                                                                                                                                                                                                       |                                 |
| CIY9                                                                      | ...dipilise tsa dihoromone tsa go thibela pelegi (pilise)                                                                                                                             |                                                                                                                                                                                                                                                                       |                                 |
| CIY10                                                                     | ...dikhondomo tsa banna                                                                                                                                                               |                                                                                                                                                                                                                                                                       |                                 |
| CIY11                                                                     | ...dikhondomo tsa basadi                                                                                                                                                              |                                                                                                                                                                                                                                                                       |                                 |
| CIY12                                                                     | ...setso                                                                                                                                                                              |                                                                                                                                                                                                                                                                       |                                 |
| CIY13                                                                     | Fa o rile setso, tlhalosa →                                                                                                                                                           |                                                                                                                                                                                                                                                                       |                                 |

Date: \_\_\_\_ / \_\_\_\_ / \_\_\_\_  
 DD / MON / Y Y Y Y

Put 5 digit PIN here → \_\_\_\_\_

|       |                                                                           |  |
|-------|---------------------------------------------------------------------------|--|
| C1Y14 | ...tse dingwe?<br>Tlhalosa→                                               |  |
| C1Y15 | A seno ke selo sa ka gale se o tlwaetseng go se dirisa fa o somola bonna? |  |

| ASK THESE OF PEOPLE WHO SAID <u>THEY HAVE NOT</u> PULLED OUT THE PENIS IN LAST 3 MOS |                                                                                                                                                                                      |                                                                                                                                                                                                             | CODE |
|--------------------------------------------------------------------------------------|--------------------------------------------------------------------------------------------------------------------------------------------------------------------------------------|-------------------------------------------------------------------------------------------------------------------------------------------------------------------------------------------------------------|------|
| CIN1                                                                                 | Ke ka ntlha yang o sa rate?<br>Write reason for not using pulling out penis here →                                                                                                   |                                                                                                                                                                                                             |      |
| CIN2                                                                                 | A o setse o kile wa dirisa mokgwa wa go somola bonna?                                                                                                                                | 0= Nnyaa<br>1= Ee                                                                                                                                                                                           |      |
| CIN3                                                                                 | [IF YES TO EVER USE]<br>Mpolelela gore kang eno e tlile <u>jang</u> , le gore <u>ke eng</u> se lo neng lo tlotla ka sone                                                             |                                                                                                                                                                                                             |      |
| CIN4                                                                                 | [IF YES TO EVER USE]<br>Ke ka ntlha yang wena kgotsa motho yo o ratanang le ene a ile a somola bonna jwa gagwe?<br><br>[DO NOT READ ANSWERS OUT LOUD – LET PARTICIPANT ANSWER FIRST] | 0= Go thibela HIV<br>1= Go thibela malwetse a a tshelanwang ka thobalano (STI)<br>2= Go thibela go ithwala<br>3= Go thibela go ithwala le bolwetse<br>4= Ga ke itse - go itiragaletse fela<br>5= Tse dingwe |      |
| CIN5                                                                                 | [If code other above write reason for pulling out here] →                                                                                                                            |                                                                                                                                                                                                             |      |
| CIN6                                                                                 | O ne o na le nako e e kae o ratana le motho yono (yo o somotseng bonna fa o na le ene)?                                                                                              | Code in months for all total time together (take out times not together).<br>Code 0 if one time partner. →                                                                                                  |      |
| CIN7                                                                                 | O ne o na le dingwaga tse kae lekgetlo la bofelo le o somotseng bonna ka lone?                                                                                                       | Code age here →                                                                                                                                                                                             |      |

Date: \_\_\_\_ / \_\_\_\_ / \_\_\_\_

DD / MON / Y Y Y Y

Put 5 digit PIN here → \_\_\_\_\_

ASK THIS PAGE TO ALL PARTICIPANTS – NO MATTER WHAT THEIR PRACTICE IS – THERE ARE NO RIGHT OR WRONG ANSWERS HERE – THESE MEASURE PARTICIPANT BELIEFS –NOT PRACTICES

Jaanong ke rata go utlwa ka dilo tse o di dumelang malebang le go somola bonna pele ga peo ya bonna e tswa, kgotsa go tshololela peo ya bonna kwa ntle. [Repeat instructions and reminders]

|      | [Provide response card]                                                                                                                                                                                                               | Ga ke dumalan e gotlhelele | Ga ke dumalane | Ke a dumalana | Ga ke dumalan e Ke a dumalana |
|------|---------------------------------------------------------------------------------------------------------------------------------------------------------------------------------------------------------------------------------------|----------------------------|----------------|---------------|-------------------------------|
| WDMP | Go nnile le dinako tse ke neng ke batla go somola bonna pele ga peo ya bonna e tswa fa ke ne ke na le (ba)motho yo ke ratanang segolo le ene                                                                                          | 1                          | 2              | 3             | 4                             |
| WDCP | Go nnile le dinako tse ke neng ke batla go somola bonna pele ga peo ya bonna e tswa fa ke ne ke na le (ba)motho yo ke ratanang go tsamaisa nako le ene                                                                                | 1                          | 2              | 3             | 4                             |
| WD1  | Ke kgona go tlhotlheletsa molekane wa me go somola bonna jwa gagwe (go tshololela peo kwa ntle) le eleng fa a sa batle.                                                                                                               | 1                          | 2              | 3             | 4                             |
| WD2  | Ke ne nka gakologelwa go somola bonna pele le eleng morago ga ke ntse ke nwa bojalwa.                                                                                                                                                 | 1                          | 2              | 3             | 4                             |
| WD3  | Ke ne nka netefatsa gore ke somole bonna (ke tshololele peo ya bonna kwa ntle) le eleng fa re tsogetswe thata roobedi.                                                                                                                | 1                          | 2              | 3             | 4                             |
| WD4  | Nka gana go robalana fa go sena sebaka sa go somola bonna.                                                                                                                                                                            | 1                          | 2              | 3             | 4                             |
| WD5  | Fa ke ne nka tshitshinya go somola bonna (go tshololela peo ya bonna kwa ntle) fa ke na le motho yo ke ratanang le ene yo ke iseng ke tle ke dire seno le ene, ke ne nka boifa gore motho yoo yo ke ratanang le ene o ne a ka nkgana. | 1                          | 2              | 3             | 4                             |
| WD6  | Fa ke ne nka tshitshinya go somola bonna motho yo ke ratanang le ene o ne a ka akanya gore ke na le bolwetse bongwe jo bo tshelanwang ka go robalana.                                                                                 | 1                          | 2              | 3             | 4                             |
| WD7  | Fa ke ne nka tshitshinya go somola bonna motho yo moswa go ratana le ene o ne a ka akanya gore ke ithaya ke re ba na le bolwetse bongwe jo bo tshelanwang ka go robalana.                                                             | 1                          | 2              | 3             | 4                             |
| WD8  | Fa ke ne nka tshitshinya go somola bonna motho yo ke ratanang le ene o ne a ka akanya gore ga ke batle go ithwala/ ga ke batle go mo dira gore a ithwale.                                                                             | 1                          | 2              | 3             | 4                             |
| WD9  | Fa ke ne nka somola bonna pele ga peo ya bonna e tswa, motho yo ke ratanang le ene o ne a ka akanya gore ke leka go tla go <u>tšenwa</u> ke mogare wa HIV.                                                                            | 1                          | 2              | 3             | 4                             |
| WD10 | Fa ke ne nka somola bonna pele ga peo ya bonna e tswa, motho yo ke ratanang le ene o ne a ka akanya gore ke leka go tla go mo <u>tshela</u> mogare wa HIV.                                                                            | 1                          | 2              | 3             | 4                             |

Date: \_\_\_\_ / \_\_\_\_ / \_\_\_\_  
 DD / MON / Y Y Y Y

Put 5 digit PIN here → \_\_\_\_\_

|      |                                                                                                           |   |   |   |   |
|------|-----------------------------------------------------------------------------------------------------------|---|---|---|---|
|      |                                                                                                           |   |   |   |   |
| WD11 | Fa ke ne nka somola bonna, motho yo ke ratanang le ene o ne a ka akanya gore ke palelwa ke go fetsa tiro. | 1 | 2 | 3 | 4 |
| WD12 | Fa ke ne nka somola bonna, motho yo ke ratanang le ene one a ka nja ditshego                              | 1 | 2 | 3 | 4 |
| WD13 | Fa ke ne nka somola bonna, motho yo ke ratanang le ene o ne a ka akanya gore ke monna yo o maatla         | 1 | 2 | 3 | 4 |
| WD14 | Fa ke ne nka somola bonna, motho yo ke ratanang le ene o ne a ka akanya gore ke kgona go ikgapha tota.    | 1 | 2 | 3 | 4 |
| WD15 | Fa ke ne nka somola bonna, motho yo ke ratanang le ene o ne a ka akanya gore ga ke itse go robalana.      | 1 | 2 | 3 | 4 |

Date: \_\_\_/\_\_\_/\_\_\_  
 DD / MON / Y Y Y Y

Put 5 digit PIN here → \_\_\_\_\_

|           |                                                                                                                                                                                       |                                                                                                                                                                                                                                | CODE |
|-----------|---------------------------------------------------------------------------------------------------------------------------------------------------------------------------------------|--------------------------------------------------------------------------------------------------------------------------------------------------------------------------------------------------------------------------------|------|
| RIS16     | Mo dikgweding tse 3 tse di fetileng, ke batho ba le kae ba o ratanang le bone ba e neng e le batho ba senna?                                                                          | Enter no. of <u>male</u> partners →                                                                                                                                                                                            |      |
| RISMCMFRQ | Mo dikgweding tse 3 tse di fetileng, o dirisitse dikhondomo kgapetsakgapetsa go le kana kang fa o na le batho ba senna ba o ratanang le bone?                                         | 0= Ga nke ke e dirisa<br>1= Ka dinako tse dingwe (kafa tlase ga halofo ya nako)<br>2= Kgapetsakgapetsa (go feta halofo ya nako)<br>3= Ka metlha<br>4= Ga ke a mmotsa (go ne go sena batho ba senna ba a ratanang le bone)      |      |
| RIS16a    | Mo bathong bano ba o ratanang le bone ba ba___ke ba le kae mo go bone ba e neng e le batho ba baswa go ratana le bone, ke gore, motho yo o neng o ise o ke o robalane le ene pele?    | Enter no. of <u>new male</u> partners →                                                                                                                                                                                        |      |
| RIS16b    | O dirisitse dikhontomo gantsi go le kana kang fa o ne o robalana le batho bano ba baswa go ratana le bone ba ba___?                                                                   | 0= Ga ke ise ke dirise ope<br>1= Ka dinako tse dingwe (kafa tlase ga halofo ya nako)<br>2= Kgapetsakgapetsa (go feta halofo ya nako)<br>3= Ka metlha<br>4= Ga ke a mmotsa (ga a na batho ba senna ba baswa go ratana le bone)  |      |
| RIS17     | Mo dikgweding tse tharo tse di fetileng, ke batho ba le kae ba o ratanang le bone ba e neng e le batho ba sesadi?                                                                     | Enter no. of <u>female</u> partners →                                                                                                                                                                                          |      |
| RISMCFRQ  | Mo dikgweding tse tharo tse di fetileng, o dirisitse dikhondomo kgapetsakgapetsa go le kana kang fa o na le batho ba sesadi ba o ratanang le bone?                                    | 0= Ga nke ke e dirisa<br>1= Ka dinako tse dingwe (kafa tlase ga halofo ya nako)<br>2= Kgapetsakgapetsa (go feta halofo ya nako)<br>3= Ka metlha<br>4= Ga ke a mmotsa (go ne go sena batho ba sesadi ba a ratanang le bone)     |      |
| RIS17a    | Mo bathong bano ba o ratanang le bone ba ba___ke ba le ba kae mo go bone ba e neng e le batho ba baswa go ratana le bone, ke gore, motho yo o neng o ise o ke o robalane le ene pele? | Enter no. of <u>new female</u> partners →                                                                                                                                                                                      |      |
| RIS17b    | O dirisitse dikhontomo gantsi go le kana kang fa o ne o robalana le batho bano ba sesadi ba baswa go ratana le bone ba ba___?                                                         | 0= Ga ke ise ke dirise ope<br>1= Ka dinako tse dingwe (kafa tlase ga halofo ya nako)<br>2= Kgapetsakgapetsa (go feta halofo ya nako)<br>3= Ka metlha<br>4= Ga ke a mmotsa (ga a na batho ba sesadi ba baswa go ratana le bone) |      |
| RIS28     | Ke batho ba le kae bano banna senna le ba sesadi ba o ratanang le bone ba ba___ba ba neng ba na le mogare wa HIV?                                                                     | 0= Nnyaa<br>1= Ee → if yes, go to next Q<br>88= Ga ke itse                                                                                                                                                                     |      |
| PAR2      | A (ba)motho yono yo o ratanang le ene yo o nang le mogare wa HIV o dirisitse di-ARV (melemo ya HIV) mo dikgweding tse 3 tse di fetileng?                                              | 0= Ga a dirisa epe<br>1= O dirisitse dingwe<br>2= Tsothle<br>88= Ga ke itse                                                                                                                                                    |      |



Date: \_\_\_ / \_\_\_ / \_\_\_  
 DD / MON / Y Y Y Y

Put 5 digit PIN here → \_\_\_\_\_

|         |                                                                                                                                                                                                                                                                                                                                                                                        |                                                                                                                                                                                                                                   |  |
|---------|----------------------------------------------------------------------------------------------------------------------------------------------------------------------------------------------------------------------------------------------------------------------------------------------------------------------------------------------------------------------------------------|-----------------------------------------------------------------------------------------------------------------------------------------------------------------------------------------------------------------------------------|--|
| RIS28b  | O dirisitse dikhondomo gantsi go le kana kang fa o ne o robalana le batho bano ba o ratanang le bone ba ba nang le mogare wa HIV?                                                                                                                                                                                                                                                      | 0= Ga ke ise ke dirise ope<br>1= Ka dinako tse dingwe (kafa tlase ga halofo ya nako)<br>2= Kgapetsakgapetsa (go feta halofo ya nako)<br>3= Ka metlha<br>4= Ga ke a mmotsa (ga a na batho ba a ratanang le bone ba ba nang le HIV) |  |
| RIS29   | Mo bathong bano ba o robalanang le bone ba ba ____ ke ba le kae mo go bone ba o <u>amogetseng</u> madi, dimpho kgotsa thuso nngwe gore o robalane le bone? (fa ke re dimpho kgotsa thuso ke raya go fiwa tuelo, ka sepalangwa, ka dijo, ka metsotso ya founu, ka diaparo, ka madi kgotsa ka sengwe le sengwe se sele, mme tuelo eno e ke nna ya tswa e sa dirwa ka nako ya thobalano.) | Code number →                                                                                                                                                                                                                     |  |
| RIS210  | Mo bathong bano ba o robalanang le bone ba ba ____ ke ba le kae mo go bone ba o <u>fileng</u> madi, dimpho kgotsa thuso nngwe gore o robalane le bone? (fa ke re dimpho kgotsa thuso ke raya go fiwa tuelo, ka sepalangwa, ka dijo, ka metsotso ya founu, ka diaparo, ka madi kgotsa ka sengwe le sengwe se sele, mme tuelo eno e ke nna ya tswa e sa dirwa ka nako ya thobalano.)     | Code number →                                                                                                                                                                                                                     |  |
| RIS211  | Mo dikgweding tse 3 tse di fetileng, a o setse o kile wa patelediwa ke mongwe gore o robalane le ene o sa batle?                                                                                                                                                                                                                                                                       | 0= Nnyaa<br>1= Ee → refer to supervisor for f/up                                                                                                                                                                                  |  |
| RIS212  | Mo dikgweding tse 3 tse di fetileng, a o ile wa tsaya loeto kgotsa wa se robale gae kgapetsa-kgapetsa? (beke ya masigo a palogare e e fetang 3 ka beke)                                                                                                                                                                                                                                | 0= Nnyaa<br>1= Ee                                                                                                                                                                                                                 |  |
| RIS213  | Mo dikgweding tse 3 tse di fetileng a o ile wa robalana le batho ka setlhophu, ke gore, a o ile wa robalana le batho ba ba fetang a le mongwe ka nako e le nngwe?                                                                                                                                                                                                                      | 0= Nnyaa<br>1= Ee, basadi fela<br>2= ee, banna fela<br>3= Ee, banna le basadi<br>4= Ga ke a e botsa                                                                                                                               |  |
| RIS214  | Mo dikgweding tse 3 tse di fetileng, a o ile wa robalana ka sebono, ke gore, moo motho yo o robalanang le ene a neng a tsentse bonna jwa gagwe mo sebonong sa gago?                                                                                                                                                                                                                    | 0= Nnyaa<br>1= Ee<br>2= Ga ke a e botsa                                                                                                                                                                                           |  |
| RIS214a | O ile wa dirisa dikhontomo gantsi go le kana kang fa o robalana ka sebono, ke gore, moo molekane wa gago yo o robalanang le ene a neng a tsentse bonna jwa gagwe mo sebonong sa gago?                                                                                                                                                                                                  | 0= Ga ke ise ke dirise ope<br>1= Ka dinako tse dingwe (kafa tlase ga halofo ya nako)<br>2= Kgapetsakgapetsa (go feta halofo ya nako)<br>3= Ka metlha<br>4= Ga ke a e botsa (ga a robalana ka sebono)                              |  |
| RIS215  |                                                                                                                                                                                                                                                                                                                                                                                        |                                                                                                                                                                                                                                   |  |

Date: \_\_\_ / \_\_\_ / \_\_\_  
 DD / MON / Y Y Y Y

Put 5 digit PIN here → \_\_\_\_\_

|               |                                                                                                                                                                                                       |                                                                                                                                                                                                                                                     |  |
|---------------|-------------------------------------------------------------------------------------------------------------------------------------------------------------------------------------------------------|-----------------------------------------------------------------------------------------------------------------------------------------------------------------------------------------------------------------------------------------------------|--|
|               | <p><b>MEN ONLY: Mo dikgweding tse 3 tse di fetileng, a o ile wa robalana ka sebono, ke gore, moo o neng o tsentse bonna jwa gago mo sebonong sa molekane wa gago yo o robalanang le?</b></p>          | <p>0= Nnyaa<br/>         1= Ee<br/>         2= Ga ke a e botsa</p>                                                                                                                                                                                  |  |
| <p>RIS215</p> | <p><b>MEN ONLY: O ile wa dirisa khondomo gantsi go le kana kang fa o robalana ka sebono, ke gore, moo o neng o tsentse bonna jwa gago mo sebonong sa molekane wa gago yo o robalanang le ene?</b></p> | <p>0= Ga ke ise ke dirise ope<br/>         1= Ka dinako tse dingwe (kafa tlase ga halofo ya nako)<br/>         2= Kgapetsakgapetsa (go feta halofo ya nako)<br/>         3= Ka metlha<br/>         4= Ga ke a e botsa (ga a robalana ka sebono)</p> |  |

Date: \_\_\_\_ / \_\_\_\_ / \_\_\_\_  
 DD / MON / Y Y Y Y

Put 5 digit PIN here → \_\_\_\_\_

COLLECT FROM ALL: VITAL SIGNS (Nurse, enrolled nurse, doctor or clinician to take vitals)

|               |                        | CODE                                                                   |  |   |  |
|---------------|------------------------|------------------------------------------------------------------------|--|---|--|
| V0            | Who took these vitals? | 0=Enrolled Nurse<br>1= Professional Nurse<br>2= Ngaka<br>3= Tse dingwe |  |   |  |
| V1BP<br>PEX11 | Blood pressure         | record mm/Hg→                                                          |  | / |  |
| V2P<br>PEX12  | Pulse                  | record beats per minute→                                               |  |   |  |
| VRR<br>PEX13  | Respiration Rate       | record breaths per minute                                              |  |   |  |
| VBT<br>PEX14  | Body Temperature       | record to 1 decimal place in degrees Celcius (XX.X) →                  |  |   |  |
| V5 W<br>PEX15 | Weight                 | record in kg→                                                          |  |   |  |
| V6H<br>PEX16  | Height                 | record in cm→                                                          |  |   |  |

**TO BE COMPLETED BY THE NURSE/DOCTOR, BASED ON PROFESSIONAL JUDGEMENT**

|        |                                                                                     | YES | NO |
|--------|-------------------------------------------------------------------------------------|-----|----|
| ELI1 9 | Presence of any condition that would interfere with achieving the study objectives? |     |    |

\_\_\_\_\_  
 Staff code

End time: \_\_\_\_ : \_\_\_\_  
 hh mm

Letlha: \_\_\_\_ / \_\_\_\_ / \_\_\_\_  
 LETSATSI / KGWEDI / NGWAGA
