# Supplementary material for: HIV incidence and predictors of inconsistent condom use among adult men enrolled into an HIV vaccine preparedness study, Rustenburg, South Africa
Source: PubMed Central journal article supplement (PMC6447216; doi:10.1371/journal.pone.0214786), 2019-04-03
Supplement: pone.0214786.s008.pdf [file pone.0214786.s008.pdf]

Date: \_\_\_\_ / \_\_\_\_ / \_\_\_\_  
 DD / MON / Y Y Y Y

Put 5 digit PIN here → \_\_\_\_\_

Start time: \_\_\_\_ : \_\_\_\_  
 hh mm

AURUM CLINICAL ASQ

| Kwezi nyanga zi-3 zidlulileyo... |                                                                                                                         |                   | CODE |
|----------------------------------|-------------------------------------------------------------------------------------------------------------------------|-------------------|------|
| STI1                             | ...ingaba ugqirha okanye unesi ukufumanise unaso nasiphi na isifo kwezo zosulela ngokwabelana ngesondo ekuthwa zii-STI? | 0= Hayi<br>1= Ewe |      |
| STI2                             | ...ukhe wanyangelwa nasiphi na isifo esiyi-STI?                                                                         | 0= Hayi<br>1= Ewe |      |
| STI3<br>RIS14                    | ...ingaba ukhe wanencindi enukayo okanye engaqhelekanga ephuma kwilungu lobufazi okanye lobudoda bakho?                 | 0= Hayi<br>1= Ewe |      |
| STI4                             | ...ungaba kukhe kwabuhlungu xa uchamayo?                                                                                | 0= Hayi<br>1= Ewe |      |
| STI5                             | ...ingaba kukhe kwabuhlungu xa usabelana ngesondo?                                                                      | 0= Hayi<br>1= Ewe |      |
| STI6<br>RIS15                    | ...ingaba ukhe wanazo naziphi na izilonda kwilungu lobufazi okanye lobudoda?                                            | 0= Hayi<br>1= Ewe |      |
| STI7                             | <b>IF FEMALE...</b> have you had any lower abdominal pain?<br>Code=97 if male                                           | 0= Hayi<br>1= Ewe |      |
| STI8                             | <b>IF FEMALE:</b> ...ukhe watshotshozelelwa kwilungu lobufazi lakho okanye kwatshisa kulo?<br>Code=97 if male           | 0= Hayi<br>1= Ewe |      |

ASK OF MEN ONLY (if female code = 97)

| Ngoku yimibuzo emalunga nokoluswa kwakho kubudoda bakho—apho kususwa khona ijwabi lakho. |                                                                                                         |                      | CODE |
|------------------------------------------------------------------------------------------|---------------------------------------------------------------------------------------------------------|----------------------|------|
| CIR1                                                                                     | Ingaba wakha woluswa kubudoda bakho ngugqirha okanye ngunesi?                                           | 0= Hayi<br>1= Ewe    |      |
| CIR2                                                                                     | [If yes, circumcised by doctor/nurse]<br>Wawumdala kangakanani xa wawusoluswa ngugqirha okanye ngunesi? | Code age<br>in years |      |
| CIR3                                                                                     | [If no, not medically circumcised]<br>Ingaba uyafuna ukuthunyelwa kugqirha onako ukukolusa?             | 0= Hayi<br>1= Ewe    |      |
| CIR4                                                                                     | Wakha woluswa ebudodeni bakho ngokwesiko lakwaNtu?                                                      | 0=Hayi<br>1=Ewe      |      |
| CIR5                                                                                     | [If circumcised in cultural practice]<br>Wawumdala kangakanani xa wawusoluswa ngokwesiko lakwaNtu?      | Code age<br>in years |      |

Date: \_\_\_\_ / \_\_\_\_ / \_\_\_\_  
 DD / MON / Y Y Y Y

Put 5 digit PIN here → \_\_\_\_\_

Ngoku ndiza kukubuza ngezinto wena neqabane lakho eninokuba nizisebenzisile kwezi nyanga zi-3 zidlulileyo. Ukuba ubuneqabane elinye kwezi nyanga zi-3 zidlulileyo, nceda ucinge ngaloo mntu xa uphendula le mibuzo. Ukuba ubunamaqabane angaphezu kwesinye kwezi nyanga zi-3 zokugqibela, nceda ucinge ngeqabane owawusabelana nalo ngesondo ubukhulu becala.

|                                                                                                                                                         |                                                                                                       |                                                                                                                                                                                                                               |
|---------------------------------------------------------------------------------------------------------------------------------------------------------|-------------------------------------------------------------------------------------------------------|-------------------------------------------------------------------------------------------------------------------------------------------------------------------------------------------------------------------------------|
| Ndiza kukufundela kolu luhlu. Nceda undixelele ukuba iqabane lakho likhe lasebenzisa nayiphi indlela kwezi zilandelayo kwiinyanga ezi-3 ezidlulileyo... |                                                                                                       | <b>CODES</b><br>0=Hayi<br>1=Ewe<br>88=Andazi<br>97= ayifanelekenga, akukho lwabelwano ngesondo                                                                                                                                |
| C1                                                                                                                                                      | i-injekshini yokucwangcisa yeehomoni (idepo)                                                          |                                                                                                                                                                                                                               |
| C2                                                                                                                                                      | iipilisi zokucwangcisa eziziihomoni (ipilisi)                                                         |                                                                                                                                                                                                                               |
| C3                                                                                                                                                      | ndasikhupha isisu                                                                                     |                                                                                                                                                                                                                               |
| Nceda undixelele ukuba iqabane lakho likhe lasebenzisa nayiphi indlela kwezi zilandelayo <u>amaxesha amangaphi</u> kwiinyanga ezi-3 ezidlulileyo...     |                                                                                                       | <b>CODES</b><br>0=Azange<br>1=Ngamanye amaxesha<br>2= kwihafu yeli xesha<br>3= Ubuninzi beli xesha<br>4=Phantse lonke elo xesha<br>5= Ngokuqinisekileyo qho ngexesha elinye<br>97= ayifanelekenga, akukho lwabelwano ngesondo |
| C4                                                                                                                                                      | iikhondom zamadoda                                                                                    |                                                                                                                                                                                                                               |
| C5                                                                                                                                                      | iikhondom zabafazi                                                                                    |                                                                                                                                                                                                                               |
| C6                                                                                                                                                      | Wabukhupha ubudoda phambi kokuchama, okanye wayikhuphela ngaphandle kwelungu lobufazi imbewu yobudoda |                                                                                                                                                                                                                               |

|                                                |                                                                             |                                 |
|------------------------------------------------|-----------------------------------------------------------------------------|---------------------------------|
| Ingaba wena okanye iqabane lakho lenza oku ... |                                                                             | <b>CODES</b><br>0=Hayi<br>1=Ewe |
| C7                                             | ukubotshwa kwemibhobho (umfazi ovalwa inzala okanye ukubotshwa kwemibhobho) |                                 |
| C8                                             | ukukhutshwa kwesizalo (uqhaqho lokukhutshwa kwesibeleko sobhinqileyo)       |                                 |
| C9                                             | uqhaqho lokuvala inzala kumadoda (amadoda enziwe amadlolo)                  |                                 |

|                                                                                                                                            |                                                                                                                          |                           |             |
|--------------------------------------------------------------------------------------------------------------------------------------------|--------------------------------------------------------------------------------------------------------------------------|---------------------------|-------------|
| Ngoku ndiza kukubuza ngokuba ngamaxesha amangaphi owabelene ngesondo ngawo kwiveki edlulileyo oko kukuthi kwezi ntsuku zisi-7 zidlulileyo. |                                                                                                                          |                           | <b>CODE</b> |
| LW1                                                                                                                                        | Mangaphi amaxesha okhe wabelana ngesondo ngawo kwezi ntsuku zisi-7 zidlulileyo, kubandakanywa nonamhlanje?               | Code number of sex acts → |             |
| LW2                                                                                                                                        | Ingaba eli linani lezenzo zokwabelana ngesondo kwilungu lobufazi kwiveki enye yesiqhelo (umlinganiselo wakho wesiqhelo)? | 0= Hayi<br>1= Ewe         |             |
| LW3                                                                                                                                        | Mangaphi amaxesha okhe wabelana ngesondo ngomva ngawo kule veki idlulileyo?                                              | Code number of sex acts → |             |

Date: \_\_\_\_ / \_\_\_\_ / \_\_\_\_  
DD / MON / Y Y Y Y

Put 5 digit PIN here → \_\_\_\_\_

|     |                                                                                                               |                   |  |
|-----|---------------------------------------------------------------------------------------------------------------|-------------------|--|
| LW4 | Ingaba eli linani lezenzo zokwabelana ngesondo ngomva kwiveki enye yesiqhelo (umlinganiselo wakho wesiqhelo)? | 0= Hayi<br>1= Ewe |  |
|-----|---------------------------------------------------------------------------------------------------------------|-------------------|--|

Date: \_\_\_\_ / \_\_\_\_ / \_\_\_\_  
 DD / MON / Y Y Y Y

Put 5 digit PIN here → \_\_\_\_\_

| ASK THESE OF PEOPLE WHO SAID THEY HAVE PULLED OUT THE PENIS IN LAST 3 MOS |                                                                                                                                                              |                                                                                                                                                                                                                                         | CODE                            |
|---------------------------------------------------------------------------|--------------------------------------------------------------------------------------------------------------------------------------------------------------|-----------------------------------------------------------------------------------------------------------------------------------------------------------------------------------------------------------------------------------------|---------------------------------|
| CIY1                                                                      | Yayimbono kabani ukubukhupha ubudoda?                                                                                                                        | 0= Imbono yam<br>1= Imbono yeqabane<br>2= Zombini<br>3= Akunjalo-kwasuka kwenzeka<br>4= Enye                                                                                                                                            |                                 |
| CIY2                                                                      | If code other above<br>Write reason for pulling out here →                                                                                                   |                                                                                                                                                                                                                                         |                                 |
| CIY3                                                                      | Ingaba wena neqabane lakho nathetha ngokumalunga nokubukhupha ubudoda bakho phambi okanye ngethuba lokwabelana ngesondo?                                     | 0= Hayi<br>1= Ewe                                                                                                                                                                                                                       |                                 |
| CIY4                                                                      | IF YES – Tell me <u>how</u> this topic came up, and <u>what</u> was discussed →                                                                              |                                                                                                                                                                                                                                         |                                 |
| CIY5                                                                      | Kwakutheni ukuze wena okanye iqabane lakho libukhuphe ubudoda?<br><br>[DO NOT READ ANSWERS OUT ALOUD – LET PARTICIPANT ANSWER FIRST. USE OTHER IF NECESSARY] | 0= Ukuthintela iHIV<br>1= Ukuthintela ii-STIs<br>2= Ukuthintela ukukhulelwa<br>3= Ukuthintela zombini ukukhulelwa nezifo<br>4= Andazi ukuba kwakutheni- kwasuka kwenzeka<br>5= Izizathu zezenkcubeko – cacisa apha ngezantsi<br>6= Enye |                                 |
| CIY6                                                                      | If coded as 'cultural' or other above write reason for pulling out here →                                                                                    |                                                                                                                                                                                                                                         |                                 |
| CIY7                                                                      | Lithuba elingakanani uneliqabane (othe wabukhupha ubudoda bakho ukunye nalo?)                                                                                | Ikhawudi ngeenyanga kwixesha lilonke lidibene (ungalibali ixesha ningekho kunye).<br>Code 0 if one time partner →                                                                                                                       |                                 |
|                                                                           | Ixesha lokugqibela ukhuphe ubudoda bakho, nceda undixelele nantoni na enye owawuyisebenzisa kwangelo xesha linye...                                          |                                                                                                                                                                                                                                         | <b>CODES</b><br>0=Hayi<br>1=Ewe |
| CIY8                                                                      | i-injekshini yokucwangcisa yeehomini (idepo)                                                                                                                 |                                                                                                                                                                                                                                         |                                 |
| CIY9                                                                      | iipilisi zokucwangcisa eziziihomoni (ipilisi)                                                                                                                |                                                                                                                                                                                                                                         |                                 |
| CIY10                                                                     | iikhondom zamadoda                                                                                                                                           |                                                                                                                                                                                                                                         |                                 |
| CIY11                                                                     | iikhondom zabafazi                                                                                                                                           |                                                                                                                                                                                                                                         |                                 |
| CIY12                                                                     | ...kwesintu                                                                                                                                                  |                                                                                                                                                                                                                                         |                                 |
| CIY13                                                                     | If traditional specify →                                                                                                                                     |                                                                                                                                                                                                                                         |                                 |
| CIY14                                                                     | ...enye? Cacisa →                                                                                                                                            |                                                                                                                                                                                                                                         |                                 |

Date: \_\_\_\_ / \_\_\_\_ / \_\_\_\_

DD / MON / Y Y Y Y

Put 5 digit PIN here → \_\_\_\_\_

|       |                                                                          |  |  |
|-------|--------------------------------------------------------------------------|--|--|
| C1Y15 | Ingaba esi yayisisizathu oqhele ukusisebenzisa xa ukhupha ubudoda bakho? |  |  |
|-------|--------------------------------------------------------------------------|--|--|

| ASK THESE OF PEOPLE WHO SAID <u>THEY HAVE NOT</u> PULLED OUT THE PENIS IN LAST 3 MOS |                                                                                                                                                                           |                                                                                                                                                                                     | CODE |
|--------------------------------------------------------------------------------------|---------------------------------------------------------------------------------------------------------------------------------------------------------------------------|-------------------------------------------------------------------------------------------------------------------------------------------------------------------------------------|------|
| CIN1                                                                                 | <b>Ngoba kutheni?</b><br>Write reason for not using pulling out penis here →                                                                                              |                                                                                                                                                                                     |      |
| CIN2                                                                                 | Ingaba wakha wasebenzisa ukubukhupha ubudoda bakho?                                                                                                                       | 0= Hayi<br>1= Ewe                                                                                                                                                                   |      |
| CIN3                                                                                 | <b>[IF YES TO EVER USE]</b><br>Ndixelele ukuba yavela <u>njani</u> le ncoko, yaye naxoxa <u>ngantoni</u>                                                                  |                                                                                                                                                                                     |      |
| CIN4                                                                                 | <b>[IF YES TO EVER USE]</b><br>Kwakutheni ukuze wena okanye iqabane lakho libukhuphe ubudoda?<br><br><b>[DO NOT READ ANSWERS OUT LOUD – LET PARTICIPANT ANSWER FIRST]</b> | 0= Ukuthintela iHIV<br>1= Ukuthintela ii-STIs<br>2= Ukuthintela ukukhulelwa<br>3= Ukuthintela zombini ukukhulelwa nezifo<br>4= Andazi ukuba kwakutheni- kwasuka kwenzeka<br>5= Enye |      |
| CIN5                                                                                 | <b>[If code other above write reason for pulling out here] →</b>                                                                                                          |                                                                                                                                                                                     |      |
| CIN6                                                                                 | Lithuba elingakanani uneliqabane (othe wabukhupha ubudoda bakho kulo ukunye nalo)?                                                                                        | Ikhawudi ngeenyanga kwixesha lilonke lidibene (ungalibali ixesha ningekho kunye).<br>Code 0 if one time partner. →                                                                  |      |
| CIN7                                                                                 | Wawumdala kangakanani kwixesha lokugqibela lokubukhupha ubudoda bakho?                                                                                                    | Code age here →                                                                                                                                                                     |      |

Date: \_\_\_\_ / \_\_\_\_ / \_\_\_\_

DD / MON / Y Y Y Y

Put 5 digit PIN here → \_\_\_\_\_

ASK THIS PAGE TO ALL PARTICIPANTS – NO MATTER WHAT THEIR PRACTICE IS – THERE ARE NO RIGHT OR WRONG ANSWERS HERE – THESE MEASURE PARTICIPANT BELIEFS –NOT PRACTICES

Ngoku ndingathanda ukuva ngeenkolelo zakho ngokubukhupha ubudoda phambi kokuba uchame, okanye ukhuphele imbewu yobudoda ngaphandle. [Repeat instructions and reminders]

|      | [Provide response card]                                                                                                                                                                            | Andivum elani ngamandla | Andivu melani | Ndiyavumelana | Ngaman dla Ndiyavu melana |
|------|----------------------------------------------------------------------------------------------------------------------------------------------------------------------------------------------------|-------------------------|---------------|---------------|---------------------------|
| WDMP | Bekukho amaxesha ebendifuna ukubukhupha ubudoda phambi kokuchama neqabane (namaqabane) lam lesiqhelo /neqabane (namaqabane) eliphambili                                                            | 1                       | 2             | 3             | 4                         |
| WDCP | Bekukho amaxesha ebendifuna ukubukhupha ubudoda phambi kokuchama neqabane (namaqabane) lam lamaxesha athile                                                                                        | 1                       | 2             | 3             | 4                         |
| WD1  | Ndinako ukulicebisa iqabane lam ukuba lilikhuphe ilungu lobudoda (imbewu yobudoda ibengaphandle) nokuba alifuni ukwenza oko.                                                                       | 1                       | 2             | 3             | 4                         |
| WD2  | Ndingakukhumbula ukulikhupha ilungu lobudoda phambi nasemva kokuba bendisela utywala.                                                                                                              | 1                       | 2             | 3             | 4                         |
| WD3  | Ndingakuqinisekisa ukuba ndiyalikhupha ilungu lobudoda (imbewu ibe yobudoda ibe ngaphandle) nokuba sobabini sivukelwe sanenkanuko yokwabelana ngesondo.                                            | 1                       | 2             | 3             | 4                         |
| WD4  | Ndingala ukwabelana ngesondo ukuba akukho thuba lokulikhupha ilungu lobudoda.                                                                                                                      | 1                       | 2             | 3             | 4                         |
| WD5  | Ukuba bendinokucebisa ngokuba likhutshwe ilungu lobudoda (imbewu yobudoda ibe ngaphandle) neqabane endingazange ndikwenze oko nalo ngaphambili, ndingaziva ndisoyika ukuba iqabane lam lingandala. | 1                       | 2             | 3             | 4                         |
| WD6  | Ukuba ndicebisa ngokulikhupha ilungu lobudoda iqabane lam lingacinga ukuba ndinezifo zokwabelana ngesondo.                                                                                         | 1                       | 2             | 3             | 4                         |
| WD7  | Ukuba ndicebisa ngokulikhupha ilungu lobudoda iqabane elitsha lingacinga ukuba ndicinge ukuba linesifo sokwabelana ngesondo.                                                                       | 1                       | 2             | 3             | 4                         |
| WD8  | Ukuba ndicebisa ngokulikhupha ilungu lobudoda iqabane lam lingacinga ukuba andifuni kukhulelwa.                                                                                                    | 1                       | 2             | 3             | 4                         |
| WD9  | Ukuba bendiza kulikhupha ilungu lobudoda phambi kokuchama, iqabane lam lingacinga ukuba bendizama ukuthintela <u>ukufumana</u> iHIV.                                                               | 1                       | 2             | 3             | 4                         |
| WD10 | Ukuba bendingalikhupha ilungu lobudoda phambi kokuchama, iqabane lam lingacinga ukuba bendizama <u>ukususela</u> abanye nge-HIV.                                                                   | 1                       | 2             | 3             | 4                         |
| WD11 | Ukuba bendingalikhupha ilungu lobudoda, iqabane lam lingacinga ukuba andikwazi ukuwugqiba umsebenzi.                                                                                               | 1                       | 2             | 3             | 4                         |
| WD12 | Ukuba bendingalikhupha ilungu lobudoda, iqabane lam                                                                                                                                                | 1                       | 2             | 3             | 4                         |

Date: \_\_\_\_ / \_\_\_\_ / \_\_\_\_

DD / MON / Y Y Y Y

Put 5 digit PIN here → \_\_\_\_\_

|      | lingandihleka                                                                                                 |   |   |   |   |
|------|---------------------------------------------------------------------------------------------------------------|---|---|---|---|
| WD13 | Ukuba bendingalikhupha ilungu lobudoda, iqabane lam lingacinga ukuba bendiyindoda enamandla                   | 1 | 2 | 3 | 4 |
| WD14 | Ukuba bendingalikhupha ilungu lobudoda, iqabane lam lingacinga ukuba ndiyakwazi ukuzilawula ngokuyimpumelelo. | 1 | 2 | 3 | 4 |
| WD15 | Ukuba bendingalikhupha ilungu lobudoda, iqabane lam lingacinga ukuba andimava kwezokwabelana ngesondo.        | 1 | 2 | 3 | 4 |

Date: \_\_\_/\_\_\_/\_\_\_  
 DD / MON / Y Y Y Y

Put 5 digit PIN here → \_\_\_\_\_

|           |                                                                                                                                |                                                                                                                                                                      | CODE |
|-----------|--------------------------------------------------------------------------------------------------------------------------------|----------------------------------------------------------------------------------------------------------------------------------------------------------------------|------|
| RIS16     | Kwezi nyanga zi-3 zidlulileyo, mangaphi kumaqabane owabelane nawo ngesondo lawo abe ngamadoda?                                 | Enter no. of <u>male</u> partners →                                                                                                                                  |      |
| RISMCMFRQ | Kwezi nyanga zi-3 zidlulileyo, ngamaxesha amangaphi osebenzise ngawo iikhondom namaqabane angamadoda akho?                     | 0=Azange<br>1= Ngamanye amaxesha (nganeno kwehafu yeli xesha)<br>2= Kaninzi (ngaphezu kwehafu yeli xesha)<br>3= Qho<br>4= Akubuzwanga (Akukho maqabane amangamadoda) |      |
| RIS16a    | Kula ___ maqabane mangaphi abengamaqabane amatsha, oko kukuthi umntu ongazange wabelane ngesondo naye ngaphambili?             | Enter no. of <u>new male</u> partners →                                                                                                                              |      |
| RIS16b    | Wazisebenzisa amaxesha amangaphi iikhondom xa wawusabelana ngesondo nala maqabane ma- ___ matsha angamadoda?                   | 0=Azange<br>1= Ngamanye amaxesha (nganeno kwehafu yeli xesha)<br>2= Kaninzi (ngaphezu kwehafu yeli xesha)<br>3= Qho<br>4= Akubuzwanga (Akukho maqabane amangamadoda) |      |
| RIS17     | Kwezi nyanga zi-3 zidlulileyo, mangaphi kumaqabane owabelane nawo ngesondo lawo abe ngabafazi?                                 | Enter no. of <u>female</u> partners →                                                                                                                                |      |
| RISMCFFRQ | Kwezi nyanga zi-3 zidlulileyo, ngamaxesha amangaphi osebenzise ngawo iikhondom namaqabane angabafazi akho?                     | 0=Azange<br>1= Ngamanye amaxesha (nganeno kwehafu yeli xesha)<br>2= Kaninzi (ngaphezu kwehafu yeli xesha)<br>3= Qho<br>4= Akubuzwanga (akukho maqabane angabafazi)   |      |
| RIS17a    | Kula ___ maqabane mangaphi abengamaqabane amatsha, oko kukuthi umntu ongazange wabelane ngesondo naye ngaphambili?             | Enter no. of <u>new female</u> partners →                                                                                                                            |      |
| RIS17b    | Wazisebenzisa amaxesha amangaphi iikhondom xa wawusabelana ngesondo nala maqabane ma- ___ matsha angamadoda?                   | 0=Azange<br>1= Ngamanye amaxesha (nganeno kwehafu yeli xesha)<br>2= Kaninzi (ngaphezu kwehafu yeli xesha)<br>3= Qho<br>4= Akubuzwanga (akukho maqabane angabafazi)   |      |
| RIS28     | Mangaphi kula maqabane ma ___ angamadoda nangabafazi abene-HIV?                                                                | 0= Hayi<br>1= Ewe → if yes, go to next Q<br>88= Andazi                                                                                                               |      |
| PAR2      | Ingaba ukho kula oliqabane elosuleleke yi-HIV- othatha ii-ARVs nokuba zeziphi na (amayeza eHIV) kwezi nyanga zi-3 zidlulileyo? | 0= Awakho<br>1= Abanye<br>2= Onke<br>88= Andazi                                                                                                                      |      |
| RIS28b    | Wazisebenzisa amaxesha amangaphi                                                                                               | 0=Azange                                                                                                                                                             |      |



Date: \_\_\_ / \_\_\_ / \_\_\_  
 DD / MON / Y Y Y Y

Put 5 digit PIN here → \_\_\_\_\_

|         |                                                                                                                                                                                                                                                                                                                                                                 |                                                                                                                                                                          |               |
|---------|-----------------------------------------------------------------------------------------------------------------------------------------------------------------------------------------------------------------------------------------------------------------------------------------------------------------------------------------------------------------|--------------------------------------------------------------------------------------------------------------------------------------------------------------------------|---------------|
|         | iikhondom xa wawusabelana ngesondo nala maqabane ane-HIV ?                                                                                                                                                                                                                                                                                                      | 1= Ngamanye amaxesha (nganeno kwehafu yeli xesha)<br>2= Kaninzi (ngaphezu kwehafu yeli xesha)<br>3= Qho<br>4= Akubuzwanga (akukho maqabane osuleleke yi-HIV)             |               |
| RIS29   | Kula maqabanema- ___ owabelana nawo ngesondo mangaphi <u>owafumana</u> imali kuwo, izipho okanye uncedo ukwenzela ukuba wabelana nawo ngesondo? (ngezipho okanye uncedo ndithetha ukuhlawula iintlawulo, izithuthi, ukutya, imizuzu yokufona, iimpahla, imali okanye nayiphi na enye intlawulo okanye engenziwanga ngexesha elifana nelo lokwabelana ngesondo.) |                                                                                                                                                                          | Code number → |
| RIS210  | Kula maqabane ma- ___ owabelana nawo ngesondo, mangaphi <u>owawanika</u> imali, izipho okanye uncedo ukwenzela ukuba wabelana nawo ngesondo? (ngezipho okanye uncedo ndithetha ukuhlawula iintlawulo, izithuthi, ukutya, imizuzu yokufona, iimpahla, imali okanye nayiphi na enye intlawulo okanye engenziwanga ngexesha elifana nelo lokwabelana ngesondo.)    |                                                                                                                                                                          | Code number → |
| RIS211  | Kwezi nyanga zi-3 zidlulileyo, ingaba wakha wanyanzeliswa ukuba wabelane ngesondo ungafuni ukwenza oko?                                                                                                                                                                                                                                                         | 0= Hayi<br>1= Ewe → refer to supervisor for f/up                                                                                                                         |               |
| RIS212  | Kwezi nyanga zi-3 zidlulileyo, ukhe wahamba okanye wahlala kude nekhaya kaninzi? (ngaphezu kobusuku obu-3 evekini ngeveki ngokuphakathi)                                                                                                                                                                                                                        | 0= Hayi<br>1= Ewe                                                                                                                                                        |               |
| RIS213  | Kwezi nyanga zi-3 zidlulileyo ingaba wakha wazibandakanya kulwabelwano ngesondo niliqela, oko kukuthi, ukwabelana ngesondo kunye nangaphezu komntu omnye ngaxeshanye?                                                                                                                                                                                           | 0= Hayi<br>1= Ewe, abafazi kuphela<br>2= ewe, amadoda kuphela<br>3= Ewe, amadoda nabafazi<br>4= Akubuzwanga                                                              |               |
| RIS214  | Kwezi nyanga zi-3 zidlulileyo ingaba ukhe wabelana ngesondo ngomva ungaphantsi apho iqabane lakho lifaka ubudoda balo kuwe ngemva?                                                                                                                                                                                                                              | 0= Hayi<br>1= Ewe<br>2= Akubuzwanga                                                                                                                                      |               |
| RIS214a | Wazisebenzisa amaxa amangaphi iikhondom xa usabelana ngesondo ungaphantsi ngomva apho iqabane lakho lifaka ilungu lobudoda kumva wakho?                                                                                                                                                                                                                         | 0=Azange<br>1= Ngamanye amaxesha (nganeno kwehafu yeli xesha)<br>2= Kaninzi (ngaphezu kwehafu yeli xesha)<br>3= Qho<br>4= Akubuzwanga (akukho kwabelana ngesondo ngomva) |               |
| RIS215  | <b>MEN ONLY:</b> Kwezi nyanga zi-3 zidlulileyo ingaba ukhe wabelana ngesondo ngomva ungaphezulu apho wena ufaka ubudoda bakho                                                                                                                                                                                                                                   | 0= Hayi<br>1= Ewe<br>2= Akubuzwanga                                                                                                                                      |               |

Date: \_\_\_\_ / \_\_\_\_ / \_\_\_\_  
 DD / MON / Y Y Y Y

Put 5 digit PIN here → \_\_\_\_\_

|        |                                                                                                                                                                        |                                                                                                                                                                          |  |
|--------|------------------------------------------------------------------------------------------------------------------------------------------------------------------------|--------------------------------------------------------------------------------------------------------------------------------------------------------------------------|--|
|        | kumva weqabane lakho?                                                                                                                                                  |                                                                                                                                                                          |  |
| RIS215 | <b>MEN ONLY: Ngamaxa amangaphi owasebenzisa ngawo ikhondom xa wawusabelana ngesondo ungaphezulu ngomva oko kukuthi, xa ufaka ilungu lobudoda kumva waqabane lakho?</b> | 0=Azange<br>1= Ngamanye amaxesha (nganeno kwehafu yeli xesha)<br>2= Kaninzi (ngaphezu kwehafu yeli xesha)<br>3= Qho<br>4= Akubuzwanga (akukho kwabelana ngesondo ngomva) |  |

Date: \_\_\_\_ / \_\_\_\_ / \_\_\_\_  
 DD / MON / Y Y Y Y

Put 5 digit PIN here → \_\_\_\_\_

COLLECT FROM ALL: VITAL SIGNS (Nurse, enrolled nurse, doctor or clinician to take vitals)

|               |                        |                                                                                        | CODE |  |   |  |
|---------------|------------------------|----------------------------------------------------------------------------------------|------|--|---|--|
| V0            | Who took these vitals? | 0=Unesi obhaliswe ngokusemthethweni<br>1= Unesi oqeqeshiweyo<br>2 = Ugqirha<br>3= Enye |      |  |   |  |
| V1BP<br>PEX11 | Blood pressure         | record mm/Hg→                                                                          |      |  | / |  |
| V2P<br>PEX12  | Pulse                  | record beats per minute→                                                               |      |  |   |  |
| VRR<br>PEX13  | Respiration Rate       | record breaths per minute                                                              |      |  |   |  |
| VBT<br>PEX14  | Body Temperature       | record to 1 decimal place in degrees Celcius (XX.X) →                                  |      |  |   |  |
| V5 W<br>PEX15 | Weight                 | record in kg→                                                                          |      |  |   |  |
| V6H<br>PEX16  | Height                 | record in cm→                                                                          |      |  |   |  |

TO BE COMPLETED BY THE NURSE/DOCTOR, BASED ON PROFESSIONAL JUDGEMENT

|        |                                                                                 | EWE | HAYI |
|--------|---------------------------------------------------------------------------------|-----|------|
| ELI1 9 | Ubukho bayo nayiphi na imeko enokuphazamisana nokufikelela kwiinjongo zophando? |     |      |

\_\_\_\_\_  
 Staff code

End time: \_\_\_\_ : \_\_\_\_  
 hh mm

Umhla: \_\_\_\_ / \_\_\_\_ / \_\_\_\_  
 DD / MON / Y Y Y Y
